# Supplementary material for: Astrocyte senescence promotes glutamate toxicity in cortical neurons
Source: PLOS journal article supplement (doi:10.1371/journal.pone.0227887), 2020-01-16
Supplement: S7 (10.1371/journal.pone.0227887.s007) [file journal.pone.0227887.s007]

| Sample      | Raw Reads  | Reads<br>After Filtering<br>and Trimming | Mapped Reads       |
|-------------|------------|------------------------------------------|--------------------|
| <b>NS1</b>  | 23,809,882 | 23,403,727                               | 21,062,807 (89.7%) |
| <b>NS2</b>  | 23,258,856 | 22,891,123                               | 20,713,954 (90.1%) |
| <b>NS3</b>  | 20,585,129 | 20,228,224                               | 18,234,258 (89.8%) |
| <b>NS4</b>  | 23,682,267 | 23,395,688                               | 20,988,408 (89.3%) |
| <b>NS5</b>  | 24,312,598 | 23,918,805                               | 21,615,591 (90.1%) |
| <b>NS6</b>  | 21,107,010 | 20,778,234                               | 18,845,265 (90.4%) |
| <b>SEN1</b> | 25,526,314 | 25,094,062                               | 22,553,948 (89.5%) |
| <b>SEN2</b> | 25,858,196 | 25,429,881                               | 22,858,881(89.6%)  |
| <b>SEN3</b> | 23,236,065 | 22,894,407                               | 20,594,937 (89.5%) |
| <b>SEN4</b> | 23,682,267 | 23,331,471                               | 21,023,811 (89.8%) |
| <b>SEN5</b> | 25,643,811 | 25,238,390                               | 22,749,668 (89.9%) |
| <b>SEN6</b> | 23,633,802 | 23,248,316                               | 20,898,565 (89.6%) |
